# Supplementary material
Source: PubMed Central journal article supplement (PMC3494933)
Supplement: 1119133109_pnas.201119133SI.pdf [file 1119133109_pnas.201119133SI.pdf]

# Supporting Information

Perona-Wright et al. 10.1073/pnas.1119133109

## SI Materials and Methods

**Viruses and Infection.** Sendai virus (Enders strain) and influenza virus A/HK-x31 ( $\times 31$ , H3N2) and A/PR/8 (PR8, H1N1) were grown, stored, and titered as described (1, 2). Mice were anesthetized by i.p. injection of 2,2,2-tribromoethanol (200 mg/kg) and infected intranasally with 250 (Sendai) or 300 (influenza) 50% egg infectious doses (EID<sub>50</sub>) in a volume of 30  $\mu$ L. Sham-infected animals received 30  $\mu$ L PBS. For virus-challenge experiments, mice that had been infected with PR8 influenza 30–45 d earlier were challenged with 30,000 EID<sub>50</sub>  $\times 31$ .

**Mixed Bone Marrow Chimeras.** CD45.1<sup>+</sup> C57BL/6 mice were lethally irradiated (950 rad) and reconstituted with  $1 \times 10^7$  bone marrow cells, comprising equal parts CD45.1<sup>+</sup>/CD45.2<sup>+</sup> WT Vert-X<sup>het</sup> and CD45.2<sup>+</sup> *Il27ra*<sup>-/-</sup> Vert-X<sup>het</sup> bone marrow. Chimeras were allowed to reconstitute for 6–8 wk before infection.

**Flow Cytometry.** Single cell suspensions were prepared from bronchoalveolar lavage, lung parenchyma, mediastinal lymph node, spleen, and peripheral blood as previously described (3, 4). Cells were incubated with Fc-block (24G2) on ice for 15 min before staining with PE- or APC-labeled tetramers specific for the Sendai virus nucleoprotein epitope (SenNP<sub>324–332</sub>K<sup>b</sup>) or influenza nucleoprotein epitope (FluNP<sub>366–374</sub>D<sup>b</sup>) for 1 h at room temperature. All tetramers were generated by the Trudeau Institute Molecular Biology Core. Some experiments instead used a Sendai-specific Pro5 Recombinant Murine MHC Pentamer (H-2K<sup>b</sup> FAPGNYPAL) (Proimmune). Cells were stained with fluorochrome-labeled antibodies for CD8 $\alpha$  (clone 53–6.7), CD44 (IM7), CD45.1 (A20), CD45.2 (104), CD62L (Mel-14), CD69 (H1.273), CD126 (D7715A7), or gp130 (125623). IL-27R $\alpha$  expression was measured by pulsing cells with recombinant murine IL-27 on ice and staining with a polyclonal anti-IL-27 Ab (R&D Systems). Propidium iodide (0.5  $\mu$ g/mL; Sigma) was used to exclude dead cells. Intracellular staining was performed using Cytofix/Cytoperm buffer and Cytoperm Permeabilization Buffer Plus (BD Biosciences) and antibodies against T-bet (clone 4B10; eBioscience) and GFP (chicken polyclonal anti-GFP from Ab-Cam plus DyLight488-conjugated goat anti-chicken IgY from Jackson ImmunoResearch). Data were acquired on a FACScan to or LSRII cytometer (BD Biosciences) and analyzed with FlowJo software (TreeStar).

**Analysis of Cell Proliferation.** To compare IL-10 induction and cell division, naive CD8<sup>+</sup> cells were sorted from the spleen of Vert-

X IL-10 reporter mice, using a FACS Vantage cell sorter (BD Biosciences). Sorted cells were >98% CD8<sup>+</sup> CD44<sup>lo</sup> CD62L<sup>hi</sup>. Cells were labeled with a violet proliferation dye, VPD450 (BD Biosciences), by incubating  $1 \times 10^7$ /mL in 1  $\mu$ M VPD450 for 15 min at 37 °C. Cells were washed and cultured for 72 h at  $5 \times 10^6$ /mL with live APCs (TCR $\beta$ <sup>-/-</sup> splenocytes,  $1.5 \times 10^6$ /mL), anti-CD3 (clone 145.2C11, 2  $\mu$ g/mL, BD Biosciences), and anti-CD28 (37.51, 2  $\mu$ g/mL, eBioscience) in the presence or absence of recombinant murine IL-27 (20 ng/mL; Peprotech). IL-10 induction was assessed by flow cytometry.

**In Vitro Activation and Cytokine Quantification.** For OTI activation in vitro, splenocytes from naive OTI animals were depleted of B cells using AffiniPure anti-mouse IgG (Jackson ImmunoResearch) and cultured at  $5 \times 10^5$ /mL with peptide-pulsed, irradiated APC [congenic splenocytes,  $5 \times 10^6$ /mL, incubated with SIINFEKL (2  $\mu$ g/mL; New England Peptide), washed and irradiated at 2,000 rad] and IL-2 (100 U/mL; Peprotech). To compare cytokine production by naive and memory CD8<sup>+</sup> cells, CD8<sup>+</sup> CD44<sup>lo</sup> CD62L<sup>hi</sup> and CD8<sup>+</sup> CD44<sup>hi</sup> CD62L<sup>lo</sup> cells were sorted from the spleens of C57BL/6 mice infected with Sendai virus 30–45 d earlier. Sort purities were >98%. Cells were cultured for 72 h with live APC, anti-CD3, and anti-CD28 in the presence or absence of recombinant murine IL-27 or IL-6 (20 ng/mL; Peprotech), as above. Cytokines in culture supernatants were quantified with the Mouse Inflammation Cytometric Bead Array kit (BD Biosciences).

**Retroviral Transduction.** For OTI activation and transduction, full-length gp130 cDNA was cloned into the MIG retrovirus (5). Empty and gp130-expressing MIG viruses were produced in 293T cells (ATCC). Spleen and lymph node cells from naive OTI animals were cultured at  $2 \times 10^6$ /mL in the presence of SIINFEKL peptide (0.1  $\mu$ M; New England Peptide) and IL-2 (100 U/mL; Peprotech) and transduced on days 1 and 2 by spinfection, in which 2 mL of retroviral supernatant containing Hepes (20 mM; Sigma) and Sequabrene (8  $\mu$ g/mL; Sigma) was mixed with  $\sim 5 \times 10^6$  activated cells in six-well plates and centrifuged at  $1,200 \times g$  for 60 min at 30 °C. Cultures were washed on day 3, rested in IL-15 (10 ng/mL; R&D) and, 4 d later, restimulated with live APC, anti-CD3, and anti-CD28. Cytokines in culture supernatants were quantified with the Mouse Inflammation Cytometric Bead Array kit (BD Biosciences).

1. Daly K, Nguyen P, Woodland DL, Blackman MA (1995) Immunodominance of major histocompatibility complex class I-restricted influenza virus epitopes can be influenced by the T-cell receptor repertoire. *J Virol* 69(12):7416–7422.
2. Hou S, Doherty PC, Zijlstra M, Jaenisch R, Katz JM (1992) Delayed clearance of Sendai virus in mice lacking class I MHC-restricted CD8<sup>+</sup> T cells. *J Immunol* 149(4):1319–1325.
3. Hogan RJ, et al. (2002) Long-term maintenance of virus-specific effector memory CD8<sup>+</sup> T cells in the lung airways depends on proliferation. *J Immunol* 169(9):4976–4981.

4. Mayer KD, et al. (2005) The functional heterogeneity of type 1 effector T cells in response to infection is related to the potential for IFN-gamma production. *J Immunol* 174(12):7732–7739.
5. Mullen AC, et al. (2001) Role of T-bet in commitment of TH1 cells before IL-12-dependent selection. *Science* 292(5523):1907–1910.
